# Supplementary material
Source: PubMed Central journal article supplement (PMC1502284)
Supplement: pnas_0604194103_1.pdf [file pnas_0604194103_1.pdf]

A

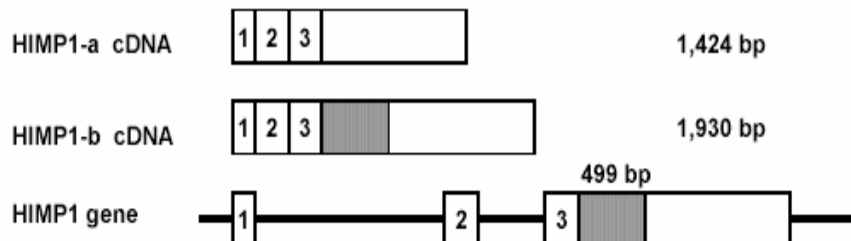

B

\*\*\*\*\*

HIMP1-a (AY028386) MSTNTDLSLSSYD--EGQGSKFIRKAKETPFVPIGMAGFAAIVAYGLYKLSRGNTKMSI  
 HIMP1-b (AY028387) MSTNTDLSLSSYD--EGQGSKFIRKAKETPFVPIGMAGFAAIVAYGLYKLSRGNTKMSI  
 Murine (BC005568) MSANKGWVVP-EGEDNLSKFLRKTRESPLVPIGVAGCLVIAAYRIYRLKARGSTKLSI  
 Rattus (BC059118) MSTNTDLSLSSYD--EGQGSKFIRKAKETPFVPIGMAGFAAIVAYGLYKLSRGNTKMSI  
 Homo (AF077034) MSTDTGVSLSPE--EDQSKLIRKAKEAPFVPIGVAGFAAIVAYGLYKLSRGNTKMSI  
 Xenopus (AB095361) MAQPGDV-LPTYDMSDSQTSKLRKSKESPFPVPIGMAGFAAVVAFGLFKLSRGNTKMSV  
 Pagrus (AY190748) MS--S-----Y---EDNESKFMKAKENPFVPIGMAGFFAIVGYRLMKMRGDTKMSV  
 Gillichthys (AF266206) MS-LD-----Y---EENQSKFMKAKENPFVPIGVITGFLGIVAYQLMKMKHRGNVMSV  
 Danio (AB094785) MSDIG-----Y---EDNESKLMRKIKQNPFPVPMAGFFAIVAYRLFKLKSRGDTKMSV  
 Seriola (AB067686) MT--A-----Y---DENESKLMRKVKENPFVPIGVAGFFAIVGYRLMKMKNRGDTKMSV  
 Drosophila (NM\_169383) MSSK---SLFDSEEDAAQANKLSRKAKESPFLVIGITGFVAAGLIGAYKYRNRGTMSTSV

\*\*\*\*\*

|                        |                                                 | (N) | Identity (%) |
|------------------------|-------------------------------------------------|-----|--------------|
| HIMP1-a (AY028386)     | HLIHMVAAQGFVVGAMTLGMGYSMYQEFW-----ANPKPKP       | 95  | (%)          |
| HIMP1-b (AY028387)     | HLIHMVAAQGFVVGAMTLGRFIRTFKFLFL-----IDAFYKAT     | 99  | 84.2         |
| Murine (BC005568)      | HLIHTRVAAQACAVGAIMLGAMYTYRDIYIKRVSEDA-----EK    | 98  | 44.8         |
| Rattus (BC059118)      | HLIHMVAAQGFVVGAMTLGMGYSMYQEFW-----A--KRKP       | 93  | 96.8         |
| Homo (AF077034)        | HLIHMVAAQGFVVGAMTVGMGYSMYREFW-----A--KPKP       | 93  | 86.0         |
| Xenopus (AB095361)     | HLIHMVAAQGFVVGAMTCVLYSMYKEYL-----AKP-SEH        | 95  | 65.3         |
| Pagrus (AY190748)      | HLIHMVAAQGFVVGAMTLGVIYTYRDFVVKPRE-----QQKAAEPK  | 92  | 63.0         |
| Gillichthys (AF266206) | HLIHMVAAQGFVVGAMTMGVIYSMYRDIYIAHPSEEK-----DE    | 90  | 61.1         |
| Danio (AB094785)       | HLIHMVAAQGFVVGAMTLGVIYSMYNEYILKPAEAQKALEQKALEKK | 99  | 60.0         |
| Seriola (AB067686)     | HLIHMVAAQGFVVGAMTVGLYSMYRDFIVKPRE-----EQKSMQNK  | 92  | 56.5         |
| Drosophila (NM_169383) | FLMQLRVAAQGTVVGCLTLGLAYSMAKEYLF-----DKAPKEK     | 95  | 43.2         |
